# Supplementary material
Source: Springer Nature journal article supplement (https://www.springermedizin.de/resource/supplementary/12962_2014_204_MOESM2_ESM.pdf/9571918)
Supplement: MOESM2 [file 9571918]

How important are these criteria in deciding on reimbursement?

**Disease severity**

**Size of the population**

**Improvement of efficacy/effectiveness**

not important  very important

not important  very important

not important  very important

Rank the criteria based on their importance in deciding on reimbursement

**Disease severity**

**Size of population**

**Improvement of efficacy/ effectiveness**

Rank:

1

3

2

Allocate 100 points over the criteria to reflect relative importance in deciding on reimbursement

**Disease severity**

**Size of population**

**Improvement of efficacy/ effectiveness**

Points:

50

20

30

Which of each of these two criteria is more important in deciding on reimbursement?

**Disease severity**

9 8 7 6 5 4 3 2 1 2 3 4 5 6 7 8 9

**Size of population**

**Disease severity**

9 8 7 6 5 4 3 2 1 2 3 4 5 6 7 8 9

**Improvement of efficacy/ effectiveness**

**Size of population**

9 8 7 6 5 4 3 2 1 2 3 4 5 6 7 8 9

**Improvement of efficacy/ effectiveness**

Consider these criteria. Which criterion is most important in deciding on reimbursement? And which is least important?

**Disease severity**

**Size of the population**

**Improvement of efficacy/effectiveness**

Most important:

Least important:
